# Supplementary material for: Modular Architecture of the STING C-Terminal Tail Allows Interferon and NF-κB Signaling Adaptation
Source: PubMed Central journal article supplement — Cell Rep. Author manuscript; Available in PMC 2020 Dec 12. (PMC7733315; doi:10.1016/j.celrep.2019.03.098), 2019-04-23
Supplement: NIHMS1649247-supplement-Supplementary_Information.pdf [file NIHMS1649247-supplement-Supplementary_Information.pdf]

**Cell Reports, Volume 27**

**Supplemental Information**

**Modular Architecture of the STING C-Terminal Tail**

**Allows Interferon and NF- $\kappa$ B Signaling Adaptation**

**Carina C. de Oliveira Mann, Megan H. Orzalli, David S. King, Jonathan C. Kagan, Amy S.Y. Lee, and Philip J. Kranzusch**

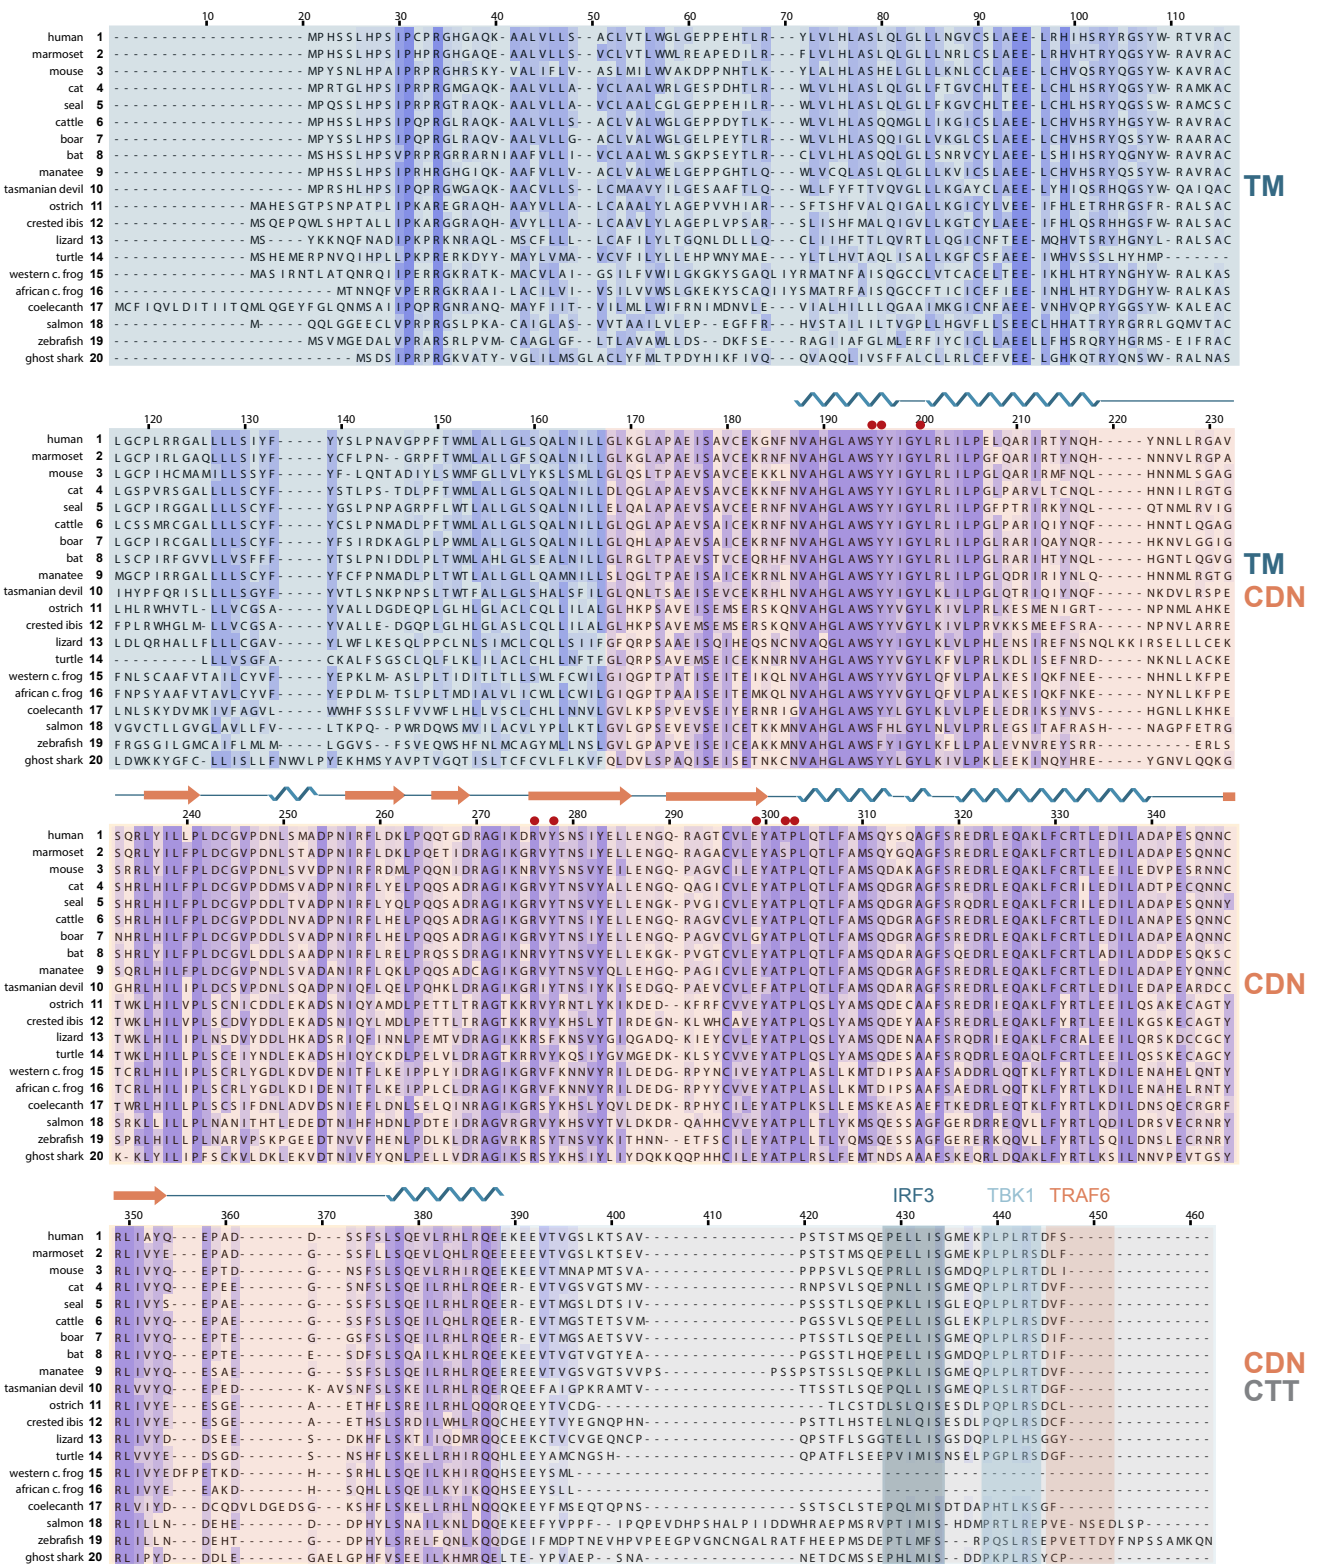

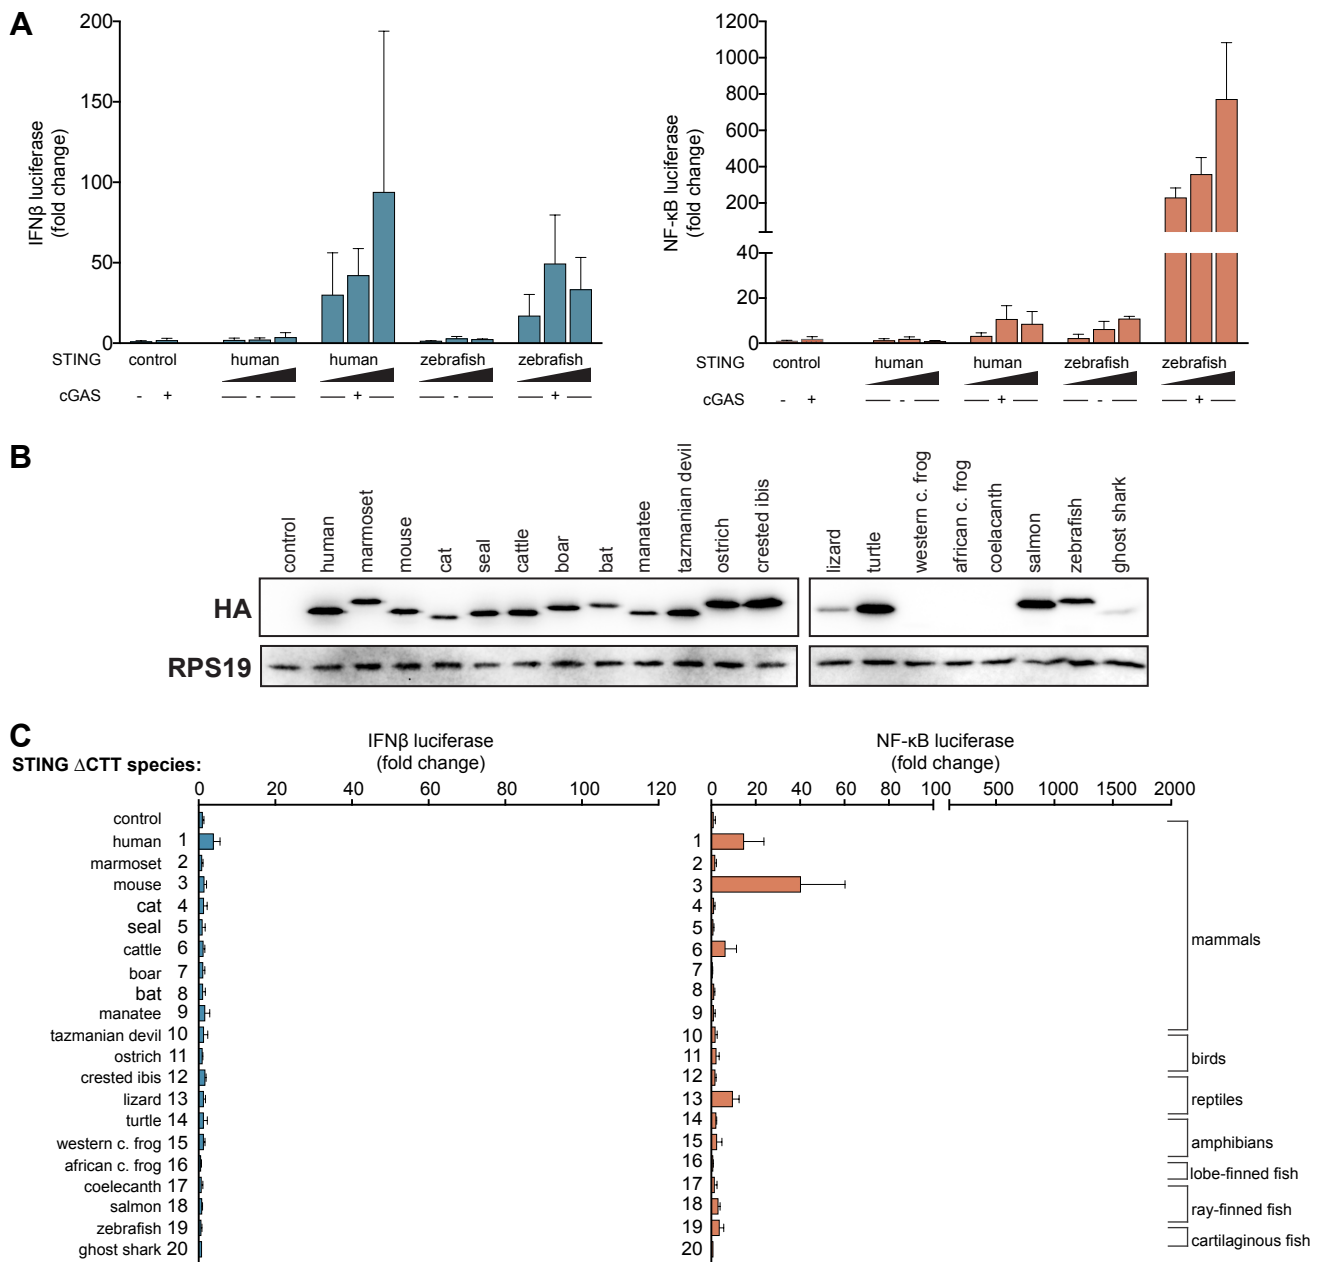

**Figure S2. The STING CTT is required for signaling, Related to Figure 1**

(A) Stimulation assays using the cellular reporter assay as in (Figure 1A). Increasing concentrations of cGAS plasmid were co-transfected with either human or zebrafish STING in HEK293T cells. The zebrafish STING-mediated increase in NF- $\kappa$ B signaling is cGAS-dependent. (B) Western blot analysis of expression levels of transfected HA-STING alleles in HEK293T cell reporter assays compared to RPS19 loading control. Data are representative of two independent experiments. (C) Cellular reporter assay as in (Figure 1A) including STING  $\Delta$ CTT species alleles from 1- human (*homo sapiens*), 2- marmoset (*Callithrix jacchus*), 3- mouse (*Mus musculus*), 4- cat (*Felis catus*), 5- seal (*Leptonychotes weddellii*), 6- cattle (*Bos taurus*), 7- boar (*Sus scrofa*), 8- bat (*Rousettus aegyptiacus*), 9- manatee (*Trichechus manatus latirostris*), 10- tasmanian devil (*Sarcophilus harrisii*), 11- ostrich (*Struthio camelus australis*), 12- crested ibis (*Nipponia nippon*), 13- lizard (*Anolis carolinensis*), 14- turtle (*Chelonia mydas*), 15- western clawed frog (*Xenopus tropicalis*), 16- african clawed frog (*Xenopus laevis*), 17- coelacanth (*Latimeria chalumnae*), 18- salmon (*Salmo salar*), 19- zebrafish (*Danio rerio*), 20- ghost shark (*Callorhynchus milii*). Cellular reporter assay data are representative of at least three independent experiments.



**Figure S3. Expression levels and CTT sequences of human–zebrafish STING chimera constructs, Related to Figures 2 and 3**

(A) Western blot analysis of expression levels of transfected STING C-terminal tail (CTT) chimeras (constructs CTT–a through CTT–o) in HEK293T cells reporter assays compared to RPS19 loading controls. Data are representative of two independent experiments. (B) Aligned CTT sequences for human–zebrafish STING chimeras (constructs CTT–a through CTT–o) with highlighted interferon  $\beta$  (dark / light blue) and NF- $\kappa$ B (orange) signaling motifs. (C) Schematics of the –110 to –50 nucleotide region of the human IFN $\beta$  enhancer depicting the four positive regulatory domains (PRDI–IV) and the associated transcription factors. Luciferase reporter assay measuring activation of individual IFN $\beta$  enhancer elements by human, zebrafish and chimera CTT–o STING. Luciferase activity was measured for 2 $\times$  IFN $\beta$  promoter and 1 $\times$  IFN $\beta$  promoter (IFN $\beta$ –110) compared to individual enhancer elements: PRD III-I (3 $\times$  copies, IRF3 binding site), PRD II (2 $\times$  copies, NF- $\kappa$ B binding site) and PRD IV (6 $\times$  copies, ATF-2–c-Jun binding site). (D) Western Blot validation of TBK1 and TRAF6 expression in the respective CRISPR/Cas9-mediated knockout cell line clones. (E) Luciferase reporter assay measuring NF- $\kappa$ B signaling in wild-type HEK293T and TRAF6-KO cells after stimulation with TNF- $\alpha$  as indicated. Cellular reporter assay data are representative of at least three independent experiments. (F) Western blot analysis of expression levels of transfected STING C-terminal tail (CTT) chimeras (human, CCT–o and CTT–o E380A) +/- cGAS in HEK293T and TRAF6-KO cells compared to RPS19 loading controls.

# A

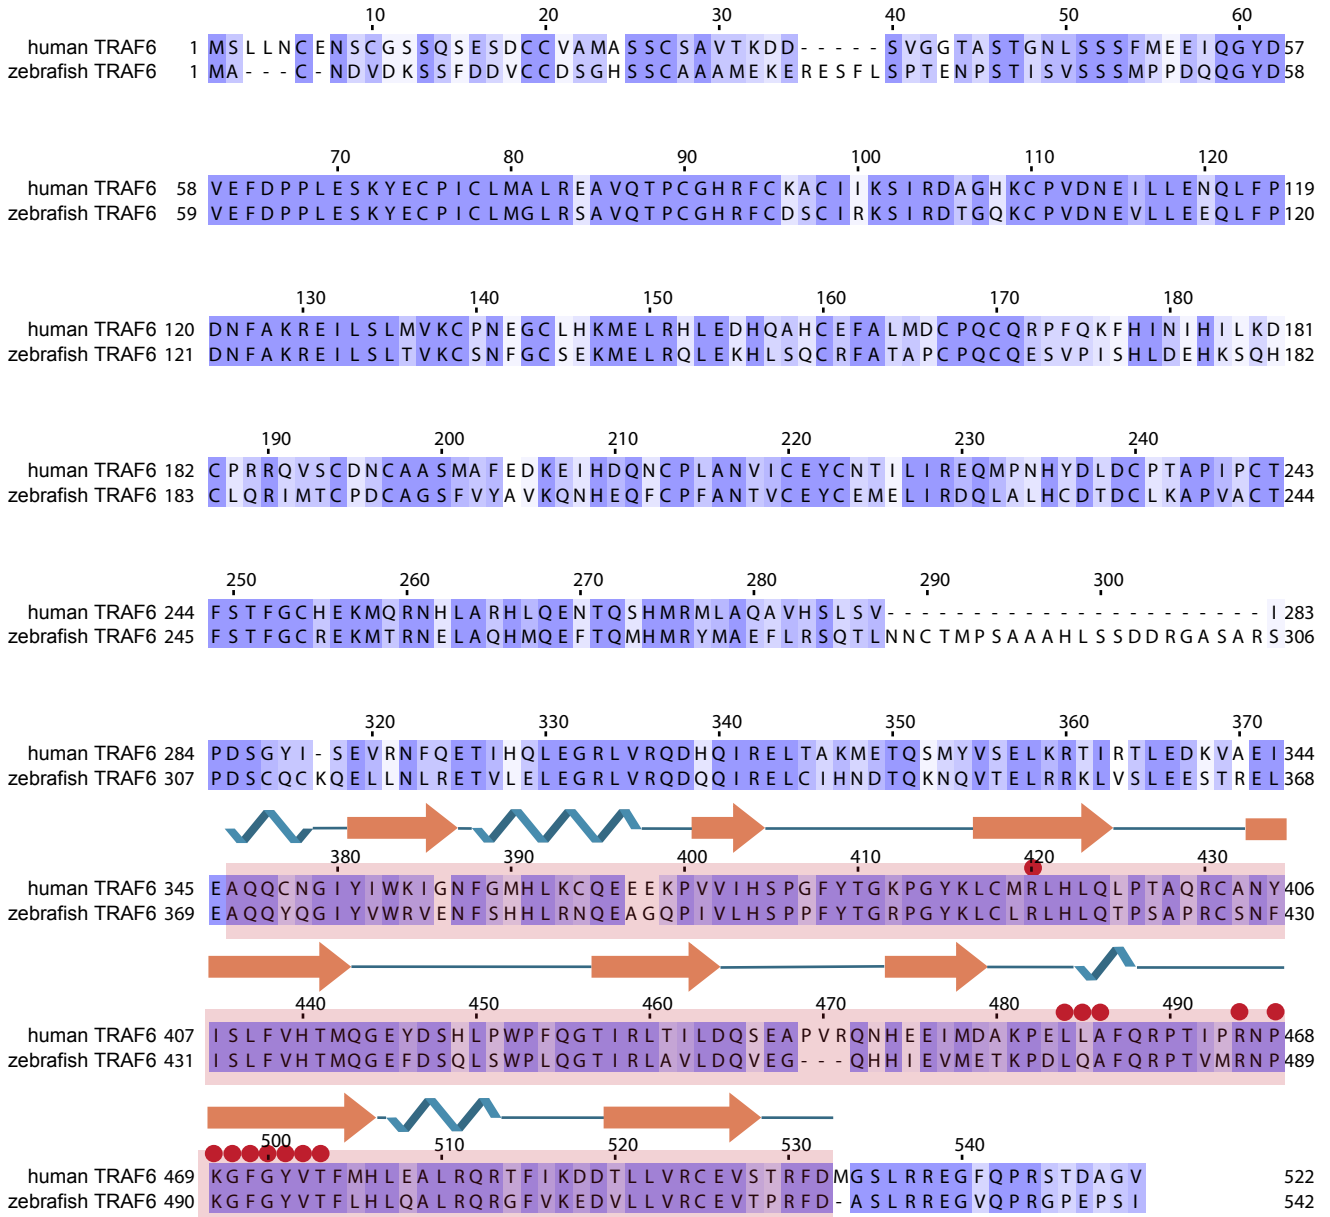

# B

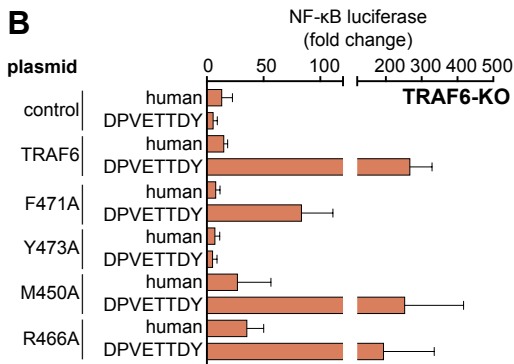

**Figure S4. Alignment of crystalized human and zebrafish TRAF6 TRAF C-domains, Related to Figure 4**

(A) Alignment of human and zebrafish TRAF6 TRAF C-domains. Secondary structure elements are shown on top for the crystallized zebrafish homolog. Darker shadings indicate higher physiochemical conservation according to BLOSUM62 score. Residues involved in intermolecular interactions with the peptide ligand are marked in red. Crystallized zebrafish TRAF6 sequence is shaded in red. (B) Cell reporter assay as in Figure 3E monitoring STING-dependent signaling in the presence of TRAF6 mutants. Endogenous TRAF6 was inactivated (TRAF6-KO) and signaling was reconstituted with plasmids encoding TRAF6 with single amino acid mutations of the residues involved in interactions with the STING CTT. Cellular reporter assay data are representative of at least three independent experiments.

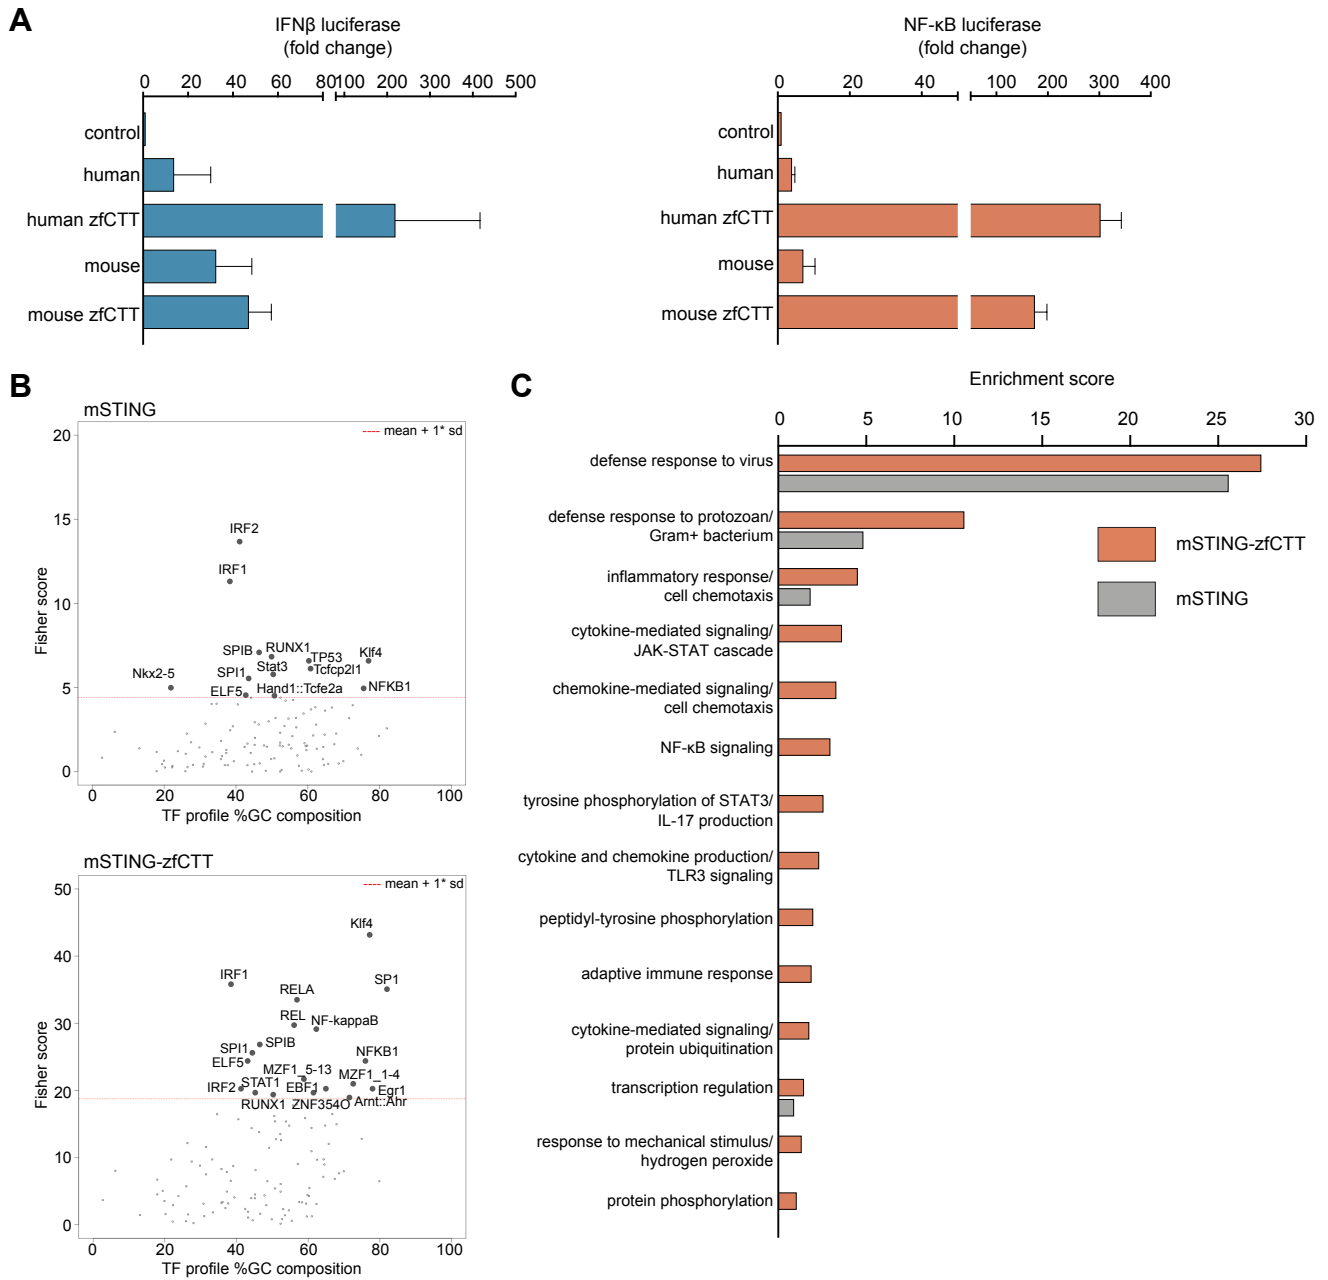

**Figure S5. RNA sequencing analysis of STING-dependent signaling, Related to Figure 5**

(A) Cellular reporter assay as in Figure 1A comparing the effect of addition of the zfCTT sequence on human STING or on mouse STING. (B) Visualization of transcription factors activated by mSTING or mSTING zfCTT. Differentially expressed genes for mSTING and mSTING zfCTT were analyzed using oPOSSUM for mouse single site analysis with default values and plotted as Fisher score vs %GC content. (C) Enrichment scores for biological processes activated by mSTING compared to mSTING zfCTT. Differentially expressed genes in mSTING or mSTING zfCTT were analyzed using GOTERM Gene Ontology analysis within DAVID.



| TRAF6-STING                                  |                        |
|----------------------------------------------|------------------------|
| <b>Data Collection</b>                       |                        |
| Resolution (Å) <sup>a</sup>                  | 48.52–1.40 (1.42–1.40) |
| Wavelength (Å)                               | 0.97918                |
| Space group                                  | P 1 21 1               |
| Unit cell: a, b, c (Å)                       | 46.62, 84.38, 53.72    |
| Unit cell: $\alpha$ , $\beta$ , $\gamma$ (°) | 90.0, 115.42, 90.0     |
| Molecules per ASU                            | 2                      |
| No. reflections: total                       | 253469                 |
| No. reflections: unique                      | 73125                  |
| Completeness (%) <sup>a</sup>                | 99.0 (94.2)            |
| Multiplicity <sup>a</sup>                    | 3.5 (3.2)              |
| $I/\sigma^a$                                 | 4.8 (1.2)              |
| CC(1/2) <sup>1</sup> (%) <sup>a</sup>        | 98.9 (49.5)            |
| Rpim <sup>2</sup> (%) <sup>a</sup>           | 7.0 (58.4)             |
| <b>Refinement</b>                            |                        |
| Resolution (Å)                               | 48.52–1.40             |
| Free reflections (%)                         | 10                     |
| R-factor / R-free                            | 18.1 / 19.9            |
| Bond distance (RMS Å)                        | 0.005                  |
| Bond angles (RMS °)                          | 0.859                  |
| <b>Structure/Stereochemistry</b>             |                        |
| No. atoms: protein                           | 2501                   |
| No. atoms: peptide                           | 134                    |
| No. atoms: ligands                           | 25 (SO <sub>4</sub> )  |
| No. atoms: water                             | 474                    |
| Average B-factor: protein                    | 18.65                  |
| Average B-factor: peptide                    | 23.34                  |
| Average B-factor: ligand                     | 47.50                  |
| Average B-factor: water                      | 33.49                  |
| Ramachandran plot: favored                   | 98.09%                 |
| Ramachandran plot: allowed                   | 1.91%                  |
| Ramachandran plot: outliers                  | 0.00%                  |
| Rotamer outliers:                            | 0.34%                  |
| MolProbity <sup>3</sup> score                | 1.20                   |
| Protein Data Bank ID                         | 6MYD                   |

<sup>a</sup> Highest resolution shell values in parenthesis

<sup>1</sup> (Karplus and Diederichs, 2012)

<sup>2</sup> (Weiss, 2001)

<sup>3</sup> (Chen et al., 2010)

**Table S2. Crystallographic statistics, Related to Figure 4**
